# Supplementary material for: Logic gates operated by bipolar photoelectrochemical water splitting
Source: Royal Society of Chemistry journal article supplement (doi:10.1039/c5cc03811a), 2015-01-01
Supplement: c5cc03811a1.pdf [file c5cc03811a1.pdf]

Supporting Information

## Logic Gates Operated by Bipolar Photoelectrochemical Water Splitting

Gabriel Loget,\* Gaozeng Li and Bruno Fabre\*

Institut des Sciences Chimiques de Rennes, UMR 6226 (MaCSE) CNRS, Université de Rennes 1,  
Campus de Beaulieu, 35042 Rennes Cedex, France

E-mail: [gabriel.loget@univ-rennes1.fr](mailto:gabriel.loget@univ-rennes1.fr); [bruno.fabre@univ-rennes1.fr](mailto:bruno.fabre@univ-rennes1.fr)

### Experimental

All solutions were prepared with ultra-pure deionized water (resistivity: 18.2 M $\Omega$  cm). The chemicals used for cleaning and etching of silicon wafer pieces were of semiconductor grade: 96-97% H<sub>2</sub>SO<sub>4</sub> (from BASF) 30% H<sub>2</sub>O<sub>2</sub> and 50% HF (both from Sigma Aldrich). Acetone (MOS electronic grade) and anhydrous ethanol (RSE electronic grade) were purchased from Carlo Erba. The In-Ga eutectic (99.99%) and the Pt wires (99.95%) were purchased from Alfa-Aesar. The *p*-type silicon (100) wafers (boron doped, 1-5  $\Omega$  cm, double side polished) were purchased from Siltronix. 1.5 x 1.2 cm<sup>2</sup> silicon pieces were cut and degreased by sonication (10 min) in acetone, ethanol and ultra-pure water. The surfaces were then cleaned in 3/1 v/v concentrated H<sub>2</sub>SO<sub>4</sub>/30% H<sub>2</sub>O<sub>2</sub> at 100 °C for 30 min, followed by copious rinsing with ultrapure water. (**Caution:** The concentrated aqueous H<sub>2</sub>SO<sub>4</sub>/ H<sub>2</sub>O<sub>2</sub> (piranha) solution is very dangerous, particularly in contact with organic materials, and should be handled extremely carefully.) The surfaces were etched with ca. 10% aq HF for 2 min in order to remove the oxide layer and generate the hydrogen-terminated surface (*p*-SiH), and then dried under an argon flow. *p*-SiH was electrically connected to a copper wire by applying a drop of In-Ga eutectic and silver paste (Electron Microscopy Sciences). After drying of the silver paste, the copper wire and the silver paste were covered with an epoxy-based resin (Loctite 9492, Henkel). The electrolyte was 50 mM H<sub>2</sub>SO<sub>4</sub> in water. The electrochemical experiments were performed with an Autolab potentiostat/galvanostat PGSTAT 302N (from Eco Chemie B.V.) in an O-ring cell with a *p*-SiH or a Pt foil acting as the working electrode (0.79 cm<sup>2</sup>). The counter electrode was a Pt ring and a KCl saturated calomel electrode (SCE) was used as the reference electrode. The bipolar electrochemical experiments were performed in an open-top 4.7 x 3.5 cm<sup>2</sup> transparent rectangular cell in which two Pt wires (2 cm long, 1 mm diameter) were positioned at the ends (separated by 4.6 cm). Prior to use, the silicon surface was immersed in 5/1 v/v 50% ultrapure water/HF for 2 min and dried under an Ar flow. The split BE composed of *p*-SiH and the Pt wire (1.5 cm long, 1 mm diameter) was connected outside the cell to the ammeter (Agilent U1253B), connected to a computer. The light was delivered by a halogen lamp placed 5 cm above the silicon surface (170 mW cm<sup>-2</sup>), and the illumination was manually switched. The current vs time profiles were acquired on the computer using the Keysight Handheld Meter Logger software (Agilent).

## Supporting Information

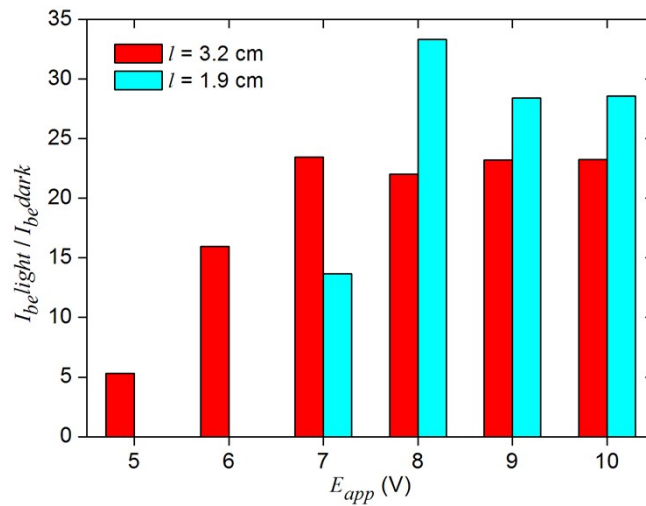

**Fig. S1.** Evolution of the ratio  $I_{be}^{light} / I_{be}^{dark}$  as a function of  $E_{app}$  for a) 1.9 cm-long and b) 3.2 cm-long BE, when a current flows through the bipolar electrode.

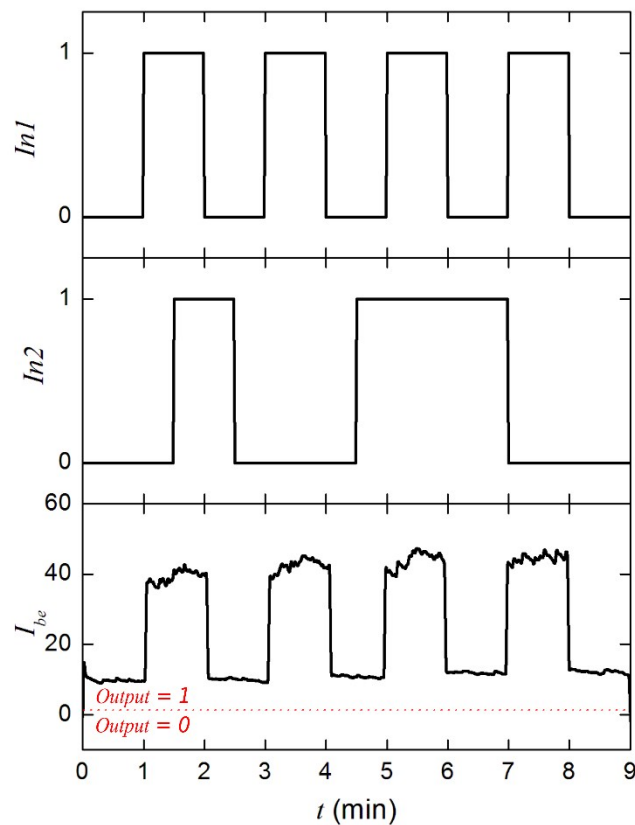

**Fig. S2.** a-c) Time-dependent profiles of the applied input signals: a)  $In1$  ( $In1 = 0$  for  $E_{app} = 7$  V and  $In1 = 1$  for  $E_{app} = 10$  V), b)  $In2$  ( $In2 = 0$  in the dark and  $In2 = 1$  under illumination) and the corresponding output signal  $I_{be}$  measured for a 3.2 cm-long BE with two Pt wires. The red line indicates the threshold current 1.5 mA.

## Supporting Information

**Table S1.** Values of the total delivered current  $I_{tot}$ , current flowing through the BE  $I_{be}$  and  $I_{be}/I_{tot}$  ratio for the AND and OR gates.

| <b>AND</b> |            |               |                             |                            |                                       |
|------------|------------|---------------|-----------------------------|----------------------------|---------------------------------------|
| <i>In1</i> | <i>In2</i> | <i>Output</i> | <i>I<sub>tot</sub> (mA)</i> | <i>I<sub>be</sub> (mA)</i> | <i>I<sub>be</sub>/I<sub>tot</sub></i> |
| 0          | 0          | 0             | 37.750 ±0.860               | 0.004 ±0.003               | 0.000                                 |
| 0          | 1          | 0             | 38.600 ±0.977               | 0.113 ±0.035               | 0.003                                 |
| 1          | 0          | 0             | 60.400 ±1.190               | 0.140 ±0.024               | 0.002                                 |
| 1          | 1          | 1             | 61.310 ±0.927               | 3.345 ±0.284               | 0.055                                 |
| <b>OR</b>  |            |               |                             |                            |                                       |
| 0          | 0          | 0             | 40.630 ±1.700               | 0.088 ±0.239               | 0.002                                 |
| 0          | 1          | 1             | 43.250 ±1.370               | 3.264 ±0.460               | 0.075                                 |
| 1          | 0          | 1             | 64.410 ±1.380               | 5.845 ±0.776               | 0.091                                 |
| 1          | 1          | 1             | 66.520 ±0.244               | 14.760 ±0.746              | 0.222                                 |
